# Supplementary material for: Lycopene prevents DEHP-induced testicular endoplasmic reticulum stress via regulating nuclear xenobiotic receptors and unfolded protein response in mice
Source: Royal Society of Chemistry journal article supplement (doi:10.1039/d1fo02729h), 2021-01-01
Supplement: d1fo02729h2.pdf [file d1fo02729h2.pdf]

## Supplemental Materials

Fig. S1. The NXR signaling pathway related genes mRNA expression of testis

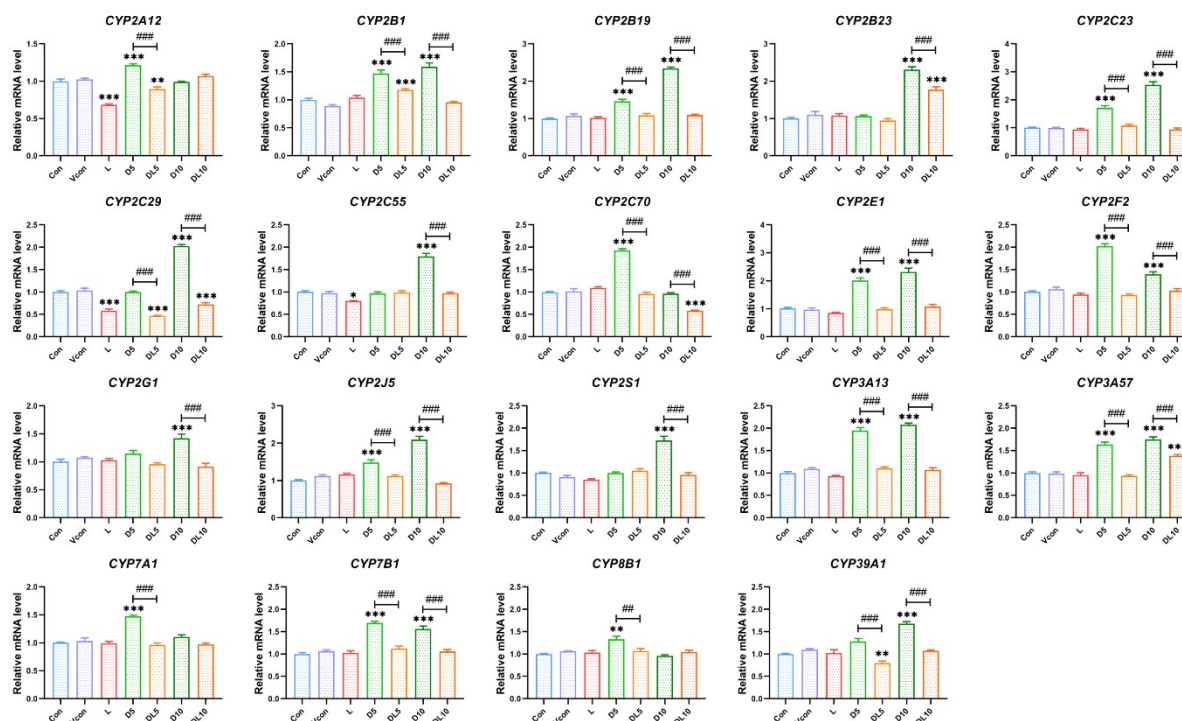

Data are presented as the mean  $\pm$  SEM. Symbol for the significance of differences between the vehicle control group and another group: \* $P$  < 0.05, \*\* $P$  < 0.01, \*\*\* $P$  < 0.001. Symbol for the significance of differences between the DEHP-treated groups and the DEHP + 5 mg/kg LYC treatment group: ## $P$  < 0.01, ### $P$  < 0.001.

**Tab. S1. Animal groups\***

| <b>Group</b>      | <b>N</b> | <b>LYC concentration (mg/kg BW<sup>6</sup> /day)</b> | <b>DEHP concentration (mg/kg BW<sup>6</sup> /day)</b> |
|-------------------|----------|------------------------------------------------------|-------------------------------------------------------|
| Con <sup>1</sup>  | 20       | 0                                                    | 0                                                     |
| Vcon <sup>2</sup> | 20       | 0                                                    | 0                                                     |
| L <sup>3</sup>    | 20       | 5                                                    | 0                                                     |
| D5 <sup>4</sup>   | 20       | 0                                                    | 500                                                   |
| DL5 <sup>5</sup>  | 20       | 5                                                    | 500                                                   |
| D10 <sup>4</sup>  | 20       | 0                                                    | 1000                                                  |
| DL10 <sup>5</sup> | 20       | 5                                                    | 1000                                                  |

\* Corn oil as vehicle dissolves DEHP and LYC.

<sup>1</sup> Con: treatment control (distilled water).

<sup>2</sup> Vcon: vehicle control (Corn oil).

<sup>3</sup> L: antagonistic control.

<sup>4</sup> D5 and D10: DEHP-exposed groups.

<sup>5</sup> DL5 and DL10: LYC antagonized DEHP-exposed groups.

<sup>6</sup> BW: Body Weight

**Tab. S2. Sequences of oligonucleotide primers for QRT-PCR**

| Gene Names | Sequence (5' → 3')                                | NCBI Reference Sequence | Amplicon size (bp) |
|------------|---------------------------------------------------|-------------------------|--------------------|
| GADPH      | AAGGTCGGTGTGAACGGATT<br>CAACAATCTCCACTTTGCCACT    | NM_001289726.1          | 82                 |
| β-actin    | CAAGAGAGGTATCCTGACCT<br>TGATCTGGGTCATCTTTTCAC     | NM_007393.5             | 188                |
| CAR        | CCCATCTGTCCGTTTGCT<br>TTCCTCATGCCAACATTTAGACAC    | NM_009803.5             | 101                |
| PXR        | GTGTCTCCGGGTGATCTCG<br>GGTCTTCAAATCTGCCGTGATG     | NM_010936.3             | 163                |
| CYP2A12    | TGAGACAGTCAGCTCCACAC<br>CCTCATGGACCTTGGCCTCT      | NM_133657.1             | 80                 |
| CYP2B10    | AGCCAACCTTCAAGGAATATGGTG<br>ATTGGGCTTCTCCTGAATCCG | NM_009999.4             | 141                |
| CYP2B19    | TGCCCCAATGAATTGTTC<br>TTGCACCACTGTTATTGGGA        | NM_007814.2             | 110                |
| CYP2B23    | GATTCAGCCAATTGTACAGGAC<br>ACTCCGCTTCCCATCCCAA     | NM_001081148.1          | 115                |
| CYP2C23    | ATTCGGGCTTCTGCTCCTTG<br>GGGAGCTTCATCTTGTCTCT      | NM_001001446.3          | 118                |
| CYP2C29    | CATGGAGCTGTTTCTAATCCTG<br>GAGGCAAATCCATTCATCACT   | NM_007815.3             | 108                |
| CYP2C55    | TGCAGGTCTACAATGCTCT<br>GTTCTTTCCTACTCGCCCCAAA     | NM_028089.3             | 114                |
| CYP2C70    | CCACAGTGAAATATGGGCTT<br>GGGTCTCCGATGTCTACCAA      | NM_145499.2             | 101                |
| CYP2E1     | CACAGCCAAGAACCCATGTACA<br>CAGGAGCCCATATCTCAGAGTTG | NM_021282.3             | 108                |
| CYP2F2     | CCTTTGACCCCGTGTTTATCC<br>TCGAAGCGACTTCCGAAGAC     | NM_007817.2             | 76                 |
| CYP2G1     | CCAAATACTCCGCTACCCAGA<br>GACACAGATGCGCTTTCCAG     | NM_013809.1             | 116                |
| CYP2J5     | GAAATCCAAGAAAATGTACAGGC<br>CATGGACTCTCGGTGAGACA   | NM_010007.4             | 84                 |

|         |                                                 |                |     |
|---------|-------------------------------------------------|----------------|-----|
| CYP2S1  | TCCCTCATCTTTGGCATCCG<br>ATCCCCAACCAAGGTCCCCT    | NM_028775.4    | 86  |
| CYP3A13 | CTGCCACCTATGATACCCTG<br>CTCTCAAGTCTTCCAGCGAT    | NM_007819.4    | 94  |
| CYP3A57 | TGGACCTAAACCACTGCCTT<br>TGTCGTCCCTCATAAAACCCC   | NM_001100180.1 | 120 |
| CYP7A1  | CGGGAAAGCAAAGACCACCT<br>TATTGTCGCGCCTGATCCGAA   | NM_007824.3    | 82  |
| CYP7B1  | CCGATTCTGCCGTCTCCTT<br>GCAGCCTTACTCTGCAAAGCTT   | NM_007825.4    | 85  |
| CYP8B1  | TTCCCCAGGTTTGTCTACTCC<br>AACCAACAGCTTATGCCGTCT  | NM_010012.3    | 128 |
| CYP39A1 | CATGAGCGACTGTATGCCTT<br>TTCCATGAGTGCCTAAACCT    | NM_018887.4    | 118 |
| RXR     | GTCCACCAGCAGTGCCAACGA<br>CCCCATGTTTGCCTCCACGTA  | NM_011305.3    | 103 |
| ATF4    | ACATTCTTGACGCTTTCCC<br>TCAACTTCACTGCCTAGCTCT    | NM_009716.3    | 89  |
| ATF6    | ATTACCAGCTACCACCCACA<br>AGTCCTGCCATTGATCACA     | NM_001081304.1 | 98  |
| GRP78   | CCAAAACCGCCTGACACCT<br>ATTCTGGTGTCAATGCGCTCT    | NM_001163434.1 | 103 |
| GRP94   | CAAGCATACCAGACGGGCAA<br>CTTCCTTAATCCGCCGCAAC    | NM_011631.1    | 118 |
| CHOP    | CTCGCTCTCCAGATTCCAGT<br>TGACCACTCTGTTTCCGTTT    | NM_007837.4    | 91  |
| EIF2a   | CAGCTTATAGACCTCCAGCCTT<br>ATGGCTTGTCACCTCCTGGAT | NM_001005509.2 | 108 |
| PERK    | ATCAGCACTTTAGATGGACGAA<br>AGACCCCACGTCCAAATCCCA | NM_001313918.1 | 81  |

---

## **Supplementary 1. Details of Materials and Methods**

### **Supplementary 1.1 Determination of CYP450 content and activities**

CYP450: The total CYP450 content was detected by measuring the difference spectrum of dithionite-reduced CO. The reaction mixtures contained 0.3 mL testis suspension and 5.7 mL phosphate buffer (PBS). After 2 min, the reaction solution was divided into two parts and added into two 3 mL cuvettes for scanning. Then the samples were inserted into CO and the absorption was measured with an ultraviolet–visible spectrophotometer. Activity was calculated using an extinction coefficient of  $91 \text{ mM}^{-1} \text{ cm}^{-1}$  (450–490 nm) and expressed in  $\text{nmol mg}^{-1}$  of protein.

NADPH-cytochrome c reductase (NCR): The reaction mixtures contained 0.2 mL testis suspension, 2.8 mL PBS and 0.1 mL cytochrome C were divided into two cuvettes. 0.02 mL NADPH ( $5 \text{ mg mL}^{-1}$ ) and the same volume of phosphate buffer were added into sample cell and reference cell, respectively. The absorption continuously recorded once every 1 min for 3 min at 550 nm by spectrophotometer. The results were expressed as  $\text{nmol mg}^{-1}$  of protein using an extinction coefficient of  $19.1 \text{ mM}^{-1} \text{ cm}^{-1}$ .

Aminopyrine N-demethylase (APND) and erythromycin N-demethylase (ERND) activity: APND and ERND activity were measured by the formation of formaldehyde. The mixture of testis suspension (0.5 mL), aminopyrine/erythromycin (0.1 mL) and potassium phosphate (0.4 mL) were incubated at  $37^\circ \text{C}$  for 3 min. The reaction was initiated by adding NADPH (0.1 mL), incubated for 30 min at  $37^\circ \text{C}$ . The absorbance was recorded at 412 nm with an ultraviolet–visible spectrophotometer. The results were expressed as  $\text{nmol of HCHO min}^{-1} \text{ mg}^{-1}$  of protein.

Aniline-4-hydroxylase (AH): AH was quantified by the NADPH-dependent formation of 4-aminophenol. 1 mL NADPH ( $1.0 \text{ mmol/L}$ ) and the same volume of PBS were added into sample cell with 0.5 mL aniline hydrochloride and reference cell for 2 min at  $37^\circ \text{C}$ . The 0.5 mL of testis suspension was added to each tube

for 30 min at 37 °C, and then was added 1 mL ice-cold TCA (200 mL/L) to stop the enzyme reaction. The reaction mixtures were ice bath for 5 min and centrifuged at 11,000g for 10 min. Then the reaction mixtures were taken 1mL supernatant in another test tube, added 1 mL 4-aminophenol (10 mL/L) and then added 1 mL sodium carbonate (1 mol/L) for 30 minutes. The absorption recorded at 630 nm by spectrophotometer. The results were expressed as nmol mg<sup>-1</sup> of protein

7-ethoxyresorufin-O-deethylase (EROD): The 2ml reaction solution includes 0.1 M Tris-HCl buffer (pH 7.8), 150 mM KCl, 0.1 mM EDTA, 5 mM MgCl<sub>2</sub>, 0.1 mg testis suspension and 10 µL of 0.5 mM 7-ethoxyresorufin. The reaction mixtures were added 10 µL of 0.01 M NADPH to start the reaction. The emission wavelength is 380nm, the excitation wavelength is 460nm, respectively.

### **Supplementary 1.2 Quantitative real time PCR (qPCR)**

The testis tissues were stored in RNA locker (Beijing Tiandi, China) and frozen at -80 °C. RNA out reagent (Beijing Tiandi, Inc. China) was used to extract total RNA from the testis (50 mg tissue) from each group. The total RNA was quantitated using the spectrophotometer (GE, USA) and purity was assessed from the 260/280 nm ratio. After synthesizing the single-stranded cDNAs, qPCR was performed to quantify gene expression in the LineGene 9620 (Hangzhou Bioer Technology Co., Ltd., China). Relative RNA equivalents for sample were obtained by standardization of GAPDH and β-actin. Relative transcript abundance was calculated using the 2<sup>-ΔΔCT</sup> method. Gene primer sets are given in Table S1.

### **Supplementary 1.3 Western Blotting**

The testis tissue samples were cracked in cold RIPA lysis buffer (Beyotime, Shanghai, China) with the protease inhibitor cocktail (MedChem Express, HY-K0010, USA). Then, the samples were pelleted by centrifugation at 12000 rpm for 15 min at 4 °C and boiled in 5× SDS-PAGE sample loading buffer (Beyotime, P0015, Shanghai, China). The Proteins were separated on 12% SDS-PAGE gels, transferred to NC

membranes, and immunoblotted with antibodies ABclonal Technology (Wuhan, Hubei, China), Bioss (Beijing, China) and ZSGB-BIO (Beijing, China). The bands of protein were exposed by using Amersham Imager 600 (GE, Switzerland) and quantified by use of ImageJ software (National Institutes of Health, USA).

#### **Supplementary 1.4 Immunohistochemistry (IHC)**

For IHC, sections were blocked with superbloc buffer (Pierce, Rockford, IL) for 30 min. The sections were then incubated with primary antibodies overnight at 4 °C. After sections were washed with PBS and incubated with secondary antibodies for 2 h at room temperature. For the development of color, sections were treated with diaminobenzidine for 2 min and counterstained with hematoxylin.<sup>25</sup> The final images were captured by using an Olympus light microscope (Olympus BX51, Tokyo, Japan) with an attached photographic machine (BX-FM; Olympus Corp, Tokyo, Japan). The positive area was quantified by the Image Pro Plus software.
